# Supplementary material
Source: MDPI journal article supplement (https://www.mdpi.com/2076-3417/8/6/950)
Supplement: s1 [file s1]

SUPPORTING INFORMATION

Gating hysteresis as biosensing parameter on silicon nanowire Field Effect Transistors

*Bergoi Ibarlucea1,2, Lotta Römhildt1, Felix Zörgiebel1,2, Sebastian Pregl1, 3, Maryam Vahdatzadeh1, Walter M.Weber2,3, Thomas Mikolajick2,3, Jörg Opitz4, Larysa Baraban1,2*, and Gianaurelio Cuniberti1,2*

1 Institute for Materials Science and Max Bergmann Center of Biomaterials, Dresden University of Technology, Budapesterstr. 27, 01069 Dresden, Germany

2 Center for Advancing Electronics Dresden, TU Dresden, 01062 Dresden, Germany

3 NamLab gGmbH, 01187 Dresden, Germany

4 Fraunhofer Institute for Ceramic Systems and Technologies IKTS, Maria-Reiche-Str. 2, 01109 Dresden, Germany

* Correspondence: [larysa.baraban@nano.tu-dresden.de](mailto:larysa.baraban@nano.tu-dresden.de)

**S1. Biochemical functionalization**

Covalent attachment of amino-terminated gold nanoparticles (AuNP) in 10 mM PBS buffer tuned to pH 8.5 allows to confirm the aminoalcohol bond formation of epoxy and amino groups (scheme in Figure S1a) on the functionalized surface (scanning electron microscopy SEM picture in Figure S1b) compared to no AuNPs on the untreated control (SEM picture in Figure S1c). 20 μM TBA with fluorescein amidite (FAM) label in 10 mM PBS of pH 8.5 is deposited onto GOPMS-treated glass samples using the GESIM Nanoplotter (GeSiM – Gesellschaft für Silizium-Mikrosysteme mbH, Radeberg, Germany) with a picoliter pipette resulting in droplets of approximately 70-80 μm in diameter. After rinsing, only bound aptamers remain, see green spots in Figure S1d.

**Figure S1.** Characterization of the biochemical functionalization steps. a) Scheme of amino-AuNPs for epoxy group labeling by covalent binding. b) AuNP binding on GOPMS surface. c) Very little attachment of AuNPs on bare surface. d) Nanoplotted spots of fluorescently labeled TBA to proof aptamer binding.

**S2. Quartz-crystal microbalance with dissipation monitoring**

A quartz crytsal microbalance (QCM) chip covered with a thin layer of Al2O3 is used to test the thrombin binding to the surface-bound aptamer and the regeneration ability of the aptamer. The chip is measured in a QCM with dissipation monitioring (QCM-D) from QSense (Biolin Scientific AB, Västra Frölunda, Sweden). It is functionalized with silane and the aptamer prior to mounting it onto the QCM-D holder. The chip is then incubated with BSA for blocking and 10 mM Tris buffer for aptamer folding before the measuring buffer SPB (sodium phosphate buffer) and thrombin are injected. Concentrations between 40.5 and 540 nM are allowed to incubate for ca. 25 min before loose thrombin is washed away with SPB. The surface is regenerated using 50 mM NaOH for 1 min which separates the aptamer and thrombin as the aptamer folding into its quadruplex structure is released. The base level is found to only slightly increase after each regeneration step. The Sauerbrey density is calculated using the QTools software based on the frequency changes delivering relative signal heights according to Sauerbrey formula, see Figure S2. These signals increase significantly corresponding to the increasing thrombin concentration with a saturation after 270 nM.

**Figure S2.** Sauerbrey density of different thrombin concentrations detected by an aptamer-functionalized Al2O3 surface before and after buffer rinse.
